# Supplementary material
Source: PubMed Central journal article supplement (PMC3401191)
Supplement: NIHMS382283-supplement-03.pdf [file NIHMS382283-supplement-03.pdf]

**1 SUPPLEMENTARY INFORMATION****2 TROCHLEAR CARTILAGE DEFORMATION**

3 *Shear Strain ( $E_{xz}$ )* – During patello-femoral articulation,  $E_{xz}$  varied with tissue depth  
4 ( $p<0.001$ ) for TRO cartilage in articulation with both an intact and defect-containing surface, and  
5 markedly decreased in a depth-dependent manner ( $p<0.001$ ) when TRO samples were slid  
6 against a focal defect (Figure 5A,B). With increasing depth from the articular surface,  $E_{xz}$   
7 decreased from  $\sim 0.1$  and  $\sim 0.03-0.04$  near the surface to low magnitudes ( $\leq 0.01$ ) near the  
8 tidemark for TRO cartilage in articulation with an intact and defect-containing surface,  
9 respectively (Figure 5C). Cartilage  $E_{xz}$  of TRO samples articulating against a defect was  $\sim 2-3x$   
10 lower than that for samples articulated against intact cartilage near the surface (Figure 6A), at  
11 20% tissue depth (Figure 6B), and overall (Figure 6C) for all lateral regions. Differences were  
12 statistically significant near the surface ( $p<0.05$ ), while differences at 20% depth ( $p=0.17$ ) and  
13 overall ( $p=0.11$ ) displayed strong trends. Local (0.4-0.6) and overall  $E_{xz}$  (0.2) did not vary  
14 laterally for TRO cartilage in articulation with intact and a defect-containing PAT cartilage. Thus,  
15 TRO cartilage in direct apposition to the focal defect shears less as it slides over the proximal  
16 defect edge of PAT cartilage than when slid against an intact surface.

17 *Axial Strain ( $E_{zz}$ )* – Similar to TRO  $E_{xz}$ ,  $-E_{zz}$  decreased significantly with depth from the  
18 articular surface ( $p<0.001$ ) for both intact (Figure 5D) and defect cases (Figure 5E), and was  
19 markedly lower ( $p<0.001$ ) for TRO cartilage in articulation with a focal defect than with an  
20 intact surface following lateral articulation. With increasing depth from the articular surface,  $-E_{zz}$   
21 decreased markedly from  $\sim 0.36$  and  $\sim 0.1-0.15$  near the surface to  $\sim 0.05$  and  $\sim 0.01$  near the  
22 tidemark for TRO cartilage in articulation with an intact and defect-containing surface,  
23 respectively (Figure 5F). Surface (Figure 6D) and overall (Figure 6F)  $-E_{zz}$  of cartilage

## Effect of a Focal Defect on Cartilage Deformation

1 articulating against a defect were ~2-4x lower ( $p < 0.01$ ) than that of cartilage in articulation  
2 against an intact surface. At 20% tissue depth, differences in cartilage  $-E_{zz}$  due to a defect were  
3 not significant ( $p = 0.3$ ) (Figure 6E). Effects of lateral location were not apparent ( $p = 0.3$ ) on  $-E_{zz}$   
4 at 20% depth, while surface and overall  $-E_{zz}$  tended ( $p = 0.1$ ) to decrease from EDGE to FAR  
5 lateral regions. Thus, TRO cartilage in direct apposition to the focal defect compresses less as it  
6 slides over the proximal defect edge of PAT cartilage than when compressed and slid against an  
7 intact surface.

8 *Lateral Strain ( $E_{xx}$ )* – Similar to PAT  $E_{xx}$ , the depth-variation as well as the magnitudes  
9 of  $E_{xx}$  were markedly different for TRO cartilage in articulation against an intact surface than  
10 that against a focal defect following lateral motion. When in articulation with intact PAT  
11 cartilage, TRO cartilage  $E_{xx}$  remained negligible ( $\leq 0.01$ ) with tissue depth ( $p = 0.6$ ) for all lateral  
12 regions (Figure 5G), while for samples in articulation against a defect,  $E_{xx}$  varied markedly with  
13 tissue depth ( $p < 0.05$ ) and lateral region ( $p < 0.01$ ) (Figure 5H). At the FAR lateral region,  $E_{xx}$   
14 decreased monotonically with increasing tissue depth, while at MID and EDGE lateral regions,  
15 peaked at ~20-30% tissue depth (Figure 5I). Near the surface, differences in  $E_{xx}$  between intact  
16 and defect cases were not statistically significant ( $p = 0.3$ ), but with increasing lateral distance,  $E_{xx}$   
17 increased from -0.01 to 0.06 ( $p < 0.05$ ) for trochlear cartilage in articulation with a defect (Figure  
18 6G). For samples sliding against a defect, TRO  $E_{xx}$  tended to be higher than that for samples in  
19 articulation against intact cartilage at 20% depth ( $p = 0.1$ ) (Figure 6H) and overall ( $p = 0.08$ ) at all  
20 lateral regions (Figure 6I). For defect cases,  $E_{xx}$  peaked ( $p < 0.05$ ) in the MID lateral region at  
21 20% depth and decreased ( $p < 0.01$ ) overall from FAR to EDGE lateral regions. For intact  
22 samples,  $E_{xx}$  at 20% depth and overall remained negligible ( $< 0.01$ ) for all lateral regions. Thus,

1  
2  
3  
4 1 TRO cartilage initially adjacent to the defect edge compresses laterally, and regions farther away  
5  
6 2 laterally are expanded laterally, as it slides over the proximal defect edge of PAT cartilage.  
7

### 8 3 **DISCUSSION**

9  
10 4 The biomechanical environment and boundary conditions of knee joint loading were  
11  
12 5 considered in the experimental design of the present study. During joint loading, patello-femoral  
13  
14 6 cartilage likely undergoes high compressive strain (5-10%)<sup>26</sup> and low sliding velocities  
15  
16 7 (estimated from refs<sup>27</sup> and<sup>28</sup>) during contralateral toe-off and heel rise phases of gait, which were  
17  
18 8 mimicked in this study by 12% compression and a 0.1mm/s sliding velocity. To replicate the  
19  
20 9 physiologic articulation and lubrication of cartilage surfaces, osteochondral samples were  
21  
22 10 isolated from the trochlear and patella of the same knee and tested in apposition with normal  
23  
24 11 bovine synovial fluid. Although, samples were tested under a matching overall compressive  
25  
26 12 strain instead of an identical compressive load which would occur physiologically, significant  
27  
28 13 elevations in strains due to the presence of a focal defect were noted despite the conservative  
29  
30 14 axial loading protocol. Furthermore, the aggregate modulus of human<sup>29</sup> and bovine<sup>18</sup> cartilage  
31  
32 15 are both depth-varying; and thus, relative depth-varying changes in deformation in bovine  
33  
34 16 cartilage due to a focal defect would likely be representative of that for human cartilage.  
35  
36  
37  
38  
39

40  
41 17 Under compression and prior to lateral motion, the tissue deformation of cartilage near,  
42  
43 18 and in apposition to, a focal defect are consistent with previous studies.<sup>12</sup> For the current samples,  
44  
45 19 PAT cartilage near the focal defect collapsed inward into the defect, and the apposing TRO  
46  
47 20 cartilage partially filled the empty defect to a tissue depth of ~10% when compressed, being  
48  
49 21 consistent with previous qualitative descriptions.<sup>11,12</sup> As a result, similar trends in intra-tissue  
50  
51 22 strains were consistent with previous reports,<sup>12</sup> with  $E_{xz}$  and  $-E_{zz}$  of cartilage near the defect  
52  
53  
54  
55  
56  
57  
58  
59  
60

1  
2  
3 1 being elevated, and strain of TRO cartilage in apposition to the focal defect increasing laterally  
4  
5 2 ( $E_{xx}$ ) and in shear ( $E_{xz}$ ), and decreasing axially ( $-E_{zz}$ ) (Figure 7) (data not reported).  
6  
7

8 3 The changes in cartilage tissue deformation were elucidated in the present study for a  
9  
10 4 relatively small focal defect, which could also provide insight into cartilage strains near the  
11  
12 5 edges of osteochondral grafts following mosaicplasty. During patello-femoral joint articulation,  
13  
14 6 the unloaded contact area between intact surfaces<sup>30</sup> is reduced by ~30% for surfaces with a  
15  
16 7 relatively small (~1 cm<sup>2</sup>) focal defect. This was mimicked in the present study with sample  
17  
18 8 contact area being reduced from 30mm<sup>2</sup> to ~21mm<sup>2</sup> following the creation of a 3mm wide focal  
19  
20 9 defect. Relatively small focal defects were addressed to elucidate how changes in mechanical  
21  
22 10 deformation may contribute to the degeneration of surrounding cartilage. Furthermore, large void  
23  
24 11 regions exist between implanted osteochondral grafts immediately following mosaicplasty, and  
25  
26 12 when loaded, tissue strains near the such regions are likely similar to those near a focal defect  
27  
28 13 edge. Although moderate to good outcomes have been reported for mosaicplasty,<sup>31</sup> such  
29  
30 14 abnormal strains in cartilage near the graft edges may be involved in causing the early  
31  
32 15 osteoarthritic changes noted in some of the patients (~17%) following this procedure.<sup>32</sup>  
33  
34  
35  
36  
37  
38

#### 39 SUPPLEMENTAL REFERENCES

- 40  
41 17 26. Eckstein, F., Hudelmaier, M., Putz, R., 2006. The effects of exercise on human articular  
42  
43 18 cartilage. *J Anat* 208, 491-512.  
44  
45 19 27. Whittle, M., 2002. *Gait Analysis: An Introduction*. Butterworth-Heinemann, Oxford; Boston.  
46  
47 20 28. Shelburne, K.B., Torry, M.R., Pandy, M.G., 2005. Muscle, ligament, and joint-contact forces  
48  
49 21 at the knee during walking. *Med Sci Sports Exerc* 37, 1948-1956.  
50  
51  
52  
53  
54  
55  
56  
57  
58  
59  
60

- 1  
2  
3  
4 1 29. Chen, A.C., Bae, W.C., Schinagl, R.M., Sah, R.L., 2001. Depth- and strain-dependent  
5  
6 2 mechanical and electromechanical properties of full-thickness bovine articular cartilage in  
7  
8 3 confined compression. *J Biomech* 34, 1-12.  
9  
10  
11 4 30. Patel, V.V., Hall, K., Ries, M., Lotz, J., Ozhinsky, E., Lindsey, C., Lu, Y., Majumdar, S.,  
12  
13 5 2004. A three-dimensional MRI analysis of knee kinematics. *J Orthop Res* 22, 283-292.  
14  
15 6 31. Hangody, L., Fules, P., 2003. Autologous osteochondral mosaicplasty for the treatment of  
16  
17 7 full-thickness defects of weight-bearing joints. Ten years of experimental and clinical  
18  
19 8 experience. *J Bone Joint Surg* 85-A, Supplement 2, 25-32.  
20  
21  
22 9 32. Haklar, U., Tuzuner, T., Kocaoglu, B., Guven, O., 2008. [Mosaicplasty technique in the  
23  
24 10 treatment of osteochondral lesions of the knee]. *Acta Orthop Traumatol Turc* 42, 344-349.  
25  
26  
27  
28  
29  
30  
31  
32  
33  
34  
35  
36  
37  
38  
39  
40  
41  
42  
43  
44  
45  
46  
47  
48  
49  
50  
51  
52  
53  
54  
55  
56  
57  
58  
59  
60
